# Supplementary material for: Peroxymonosulfate Activation by Bi-Fe Oxide Co-Doped Graphitic Carbon Nitride for Degradation of Sulfamethoxazole: Performance and Mechanism
Source: MDPI journal article supplement (doi:10.3390/app14083181), 2024-04-10
Supplement: s1 [file s1]

# Peroxymonosulfate Activation by Bi-Fe Oxide Co-doped Graphitic Carbon Nitride for Degradation of Sulfamethoxazole: Performance and Mechanism

Zhili Wang <sup>1</sup>, Lan Liang <sup>1</sup>, Ning Li <sup>1,\*</sup>, Shuang Wu <sup>2</sup>, Zhanjun Cheng <sup>1,\*</sup>, Beibei Yan <sup>1</sup> and Guanyi Chen <sup>1,3</sup>

<sup>1</sup> Tianjin Key Laboratory of Biomass Waste Utilization, School of Environmental Science and Engineering, Tianjin University, Tianjin 300072, China; 17822015170@163.com (Z.W.); lianglan0624@163.com (L.L.); yanbeibei@tju.edu.cn (B.Y.); chen@tju.edu.cn (G.C.)

<sup>2</sup> Georgia Tech Shenzhen Institute, Tianjin University, Shenzhen 518071, China; wushuang9991@tju.edu.cn

<sup>3</sup> School of Mechanical Engineering, Tianjin University of Commerce, Tianjin 300134, China

\* Correspondence: lnenchem@163.com (N.L.); zjcheng@tju.edu.cn (Z.C.); Tel.: +61-85-2238-3468 (N.L.); +022-8740-1929 (Z.C.)

**Supporting Information: 3 pages, 2 figures, 6 tables.**

## 1. Liquid Chromatograph-Mass Spectroscopy (LC-MS) Analysis

The degradation intermediates of SMX were further identified using a HPLC-MS equipped with an ultimate XB C18 column (1.8  $\mu$ m, 2.1\*100 mm), which was coupled to a high-resolution time-of-flight mass spectrometer (Thermos TSQ Quantum Ultra) with an electrospray ionization (ESI) source in a negative ion model. The mass parameters were a ion spray voltage of 3200 V, a capillary temperature of 300°C, and a max spray current of 100 A. The mobile phases consisted of water with 0.1% formic acid (A) and acetonitrile with 0.1% formic acid (B). The gradient elution method for the two mobile phases was as follows: 85% A for 0–2 min; 85% A decreased to 5% A lineally for 2–9 min and kept for 9–11 min; 5% A increased to 85% A lineally for 11–11.01 min and kept for 11.01–15 min. The flow rate was kept at 0.3 mL/min.

## 2. The spectrum of JCPDS #46-0416 (Bi<sub>25</sub>FeO<sub>40</sub>) and Bi@Fe/CN

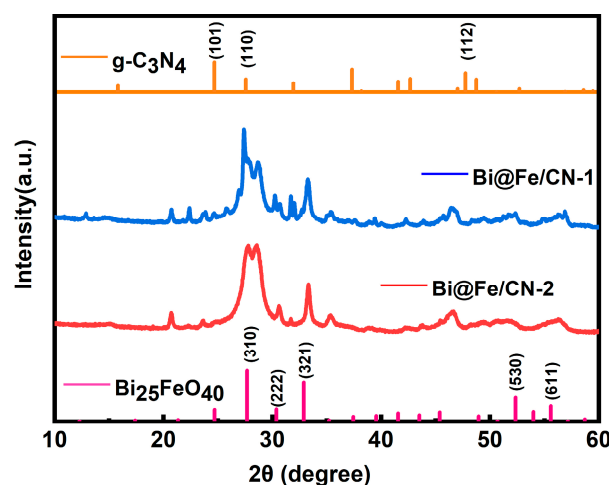

**Figure S1.** The spectrum of JCPDS #46-0416 (Bi<sub>25</sub>FeO<sub>40</sub>) and Bi@Fe/CN.

### 3. Stability and recyclability of Bi@Fe/CN-3

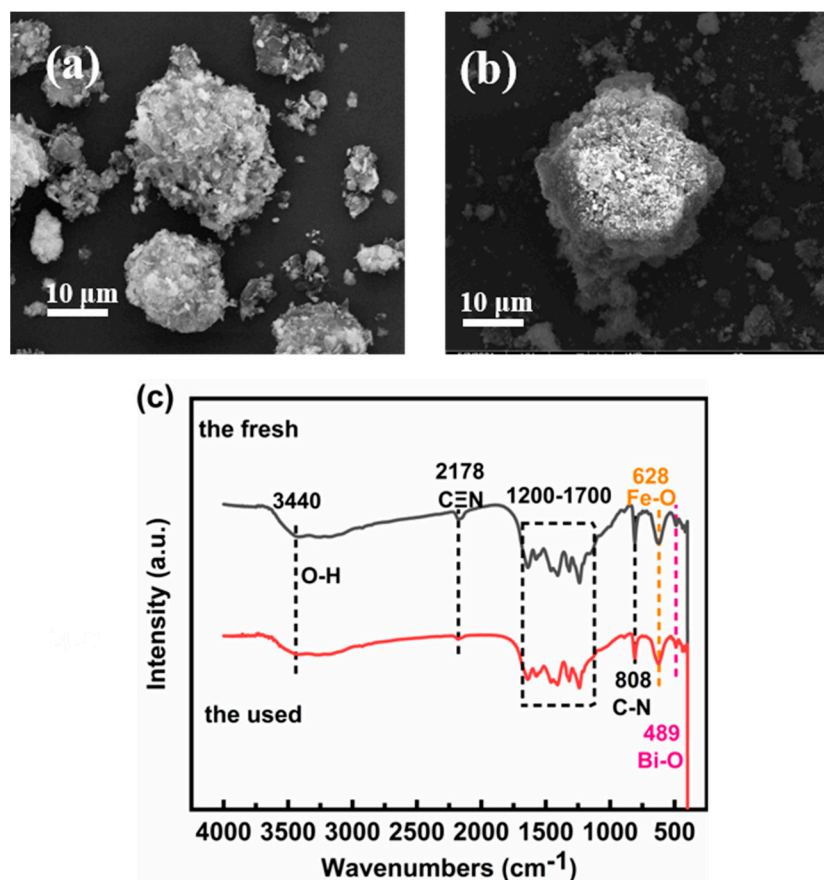

**Figure S2.** SEM of (a) fresh Bi@Fe/CN-3 and (b) used Bi@Fe/CN-3, (c) FTIR of fresh and used Bi@Fe/CN-3 (Vertical lines: Different peaks of Bi@Fe/CN).

**Table S1.** Different atom contents of fresh and used Bi@Fe/CN-3 catalysts.

| Samples                       | Fresh Bi@Fe/CN-3 | Used Bi@Fe/CN-3 |
|-------------------------------|------------------|-----------------|
| Bi content, at. %             | 6.42             | 6.32            |
| O content, at. %              | 26               | 25.68           |
| N content, at. %              | 28.61            | 29.07           |
| Fe content, at. %             | 9.45             | 9.11            |
| C content, at. % <sup>a</sup> | 29.52            | 29.82           |

### 4. The rate constants and SMX removal rate of each experiment

The rate constants and SMX removal rate of each experiment were listed in Table S2–7. The reaction conditions were as follows: [catalyst] = 0.10 g/L, [PMS] = 0.60 mM, [SMX]<sub>0</sub> = 15.0 mg/L, initial pH = 5.18

**Table S2.** Effect of catalyst dosage on SMX degradation in Bi@Fe/CN-3/PMS system.

| Catalyst dosage (g/L) | SMX removal rate (%) | <i>k</i> (min <sup>-1</sup> ) |
|-----------------------|----------------------|-------------------------------|
| 0.025                 | 26.1                 | 0.0047                        |
| 0.050                 | 76.2                 | 0.0217                        |
| 0.100                 | 99.7                 | 0.0911                        |
| 0.200                 | 100                  | 0.0194                        |

**Table S3.** Effect of PMS concentration on SMX degradation in Bi@Fe/CN-3/PMS system.

| PMS (mM) | SMX removal rate (%) | <i>k</i> (min <sup>-1</sup> ) |
|----------|----------------------|-------------------------------|
| 0.2      | 70.1                 | 0.0179                        |
| 0.4      | 93.1                 | 0.0419                        |
| 0.6      | 99.7                 | 0.0911                        |
| 0.8      | 99.5                 | 0.0921                        |

**Table S4.** Effect of initial pH on SMX degradation in Bi@Fe/CN-3/PMS system.

| Initial pH | SMX removal rate (%) | <i>k</i> (min <sup>-1</sup> ) |
|------------|----------------------|-------------------------------|
| 3.01       | 55.9                 | 0.0116                        |
| 5.18       | 99.7                 | 0.0911                        |
| 7.02       | 72.3                 | 0.0202                        |
| 9.00       | 71.1                 | 0.0192                        |

**Table S5.** Effect of different anions on SMX degradation in Bi@Fe/CN-3/PMS system.

| Anions                                      | Concentration (mM) | SMX removal rate (%) | <i>k</i> (min <sup>-1</sup> ) |
|---------------------------------------------|--------------------|----------------------|-------------------------------|
| H <sub>2</sub> PO <sub>4</sub> <sup>-</sup> | 10                 | 36.2                 | 0.0068                        |
| H <sub>2</sub> PO <sub>4</sub> <sup>-</sup> | 100                | 44.8                 | 0.0083                        |
| HCO <sub>3</sub> <sup>-</sup>               | 10                 | 10.2                 | 0.0012                        |
| HCO <sub>3</sub> <sup>-</sup>               | 100                | 48.4                 | 0.0073                        |
| Cl <sup>-</sup>                             | 10                 | 83.7                 | 0.0289                        |
| Cl <sup>-</sup>                             | 100                | 99.9                 | 0.1173                        |
| NO <sub>3</sub> <sup>-</sup>                | 10                 | 79.1                 | 0.0250                        |
| NO <sub>3</sub> <sup>-</sup>                | 100                | 88.2                 | 0.0328                        |

**Table S6.** Degradation of SMX with different scavengers in Bi@Fe/CN-3/PMS system.

| Scavengers  | SMX removal rate (%) | <i>k</i> (min <sup>-1</sup> ) |
|-------------|----------------------|-------------------------------|
| Control     | 99.8                 | 0.0911                        |
| MeOH        | 39.2                 | 0.0074                        |
| TBA         | 45.3                 | 0.0095                        |
| L-histidine | 0.18                 | 0.0001                        |
