# Supplementary material for: Peroxymonosulfate Activation by Bi-Fe Oxide Co-Doped Graphitic Carbon Nitride for Degradation of Sulfamethoxazole: Performance and Mechanism
Source: MDPI journal article supplement (doi:10.3390/app14083181), 2024-04-10
Supplement: s1 [file s1]

Archive with 1 entries (1 files):
- applsci-2883672-supplementary.pdf
